# Supplementary material
Source: Springer Nature journal article supplement (https://www.springermedizin.de/resource/supplementary/12939_2012_373_MOESM2_ESM.pdf/9551000)

# HDI in 1960

## Men

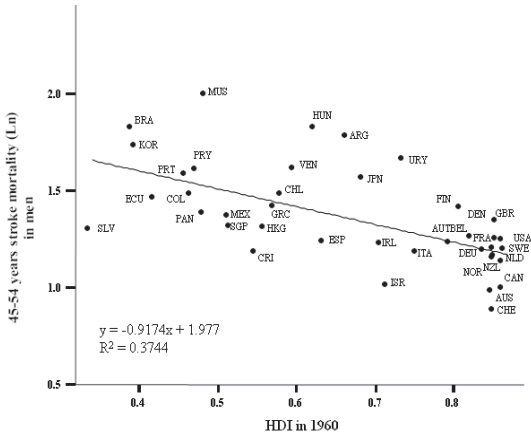

## Women

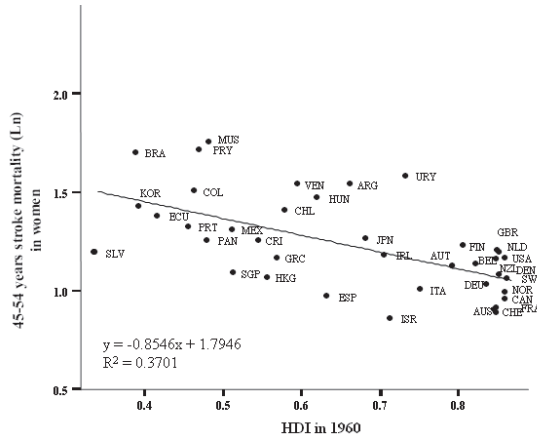

# HDI in 1999

## Men

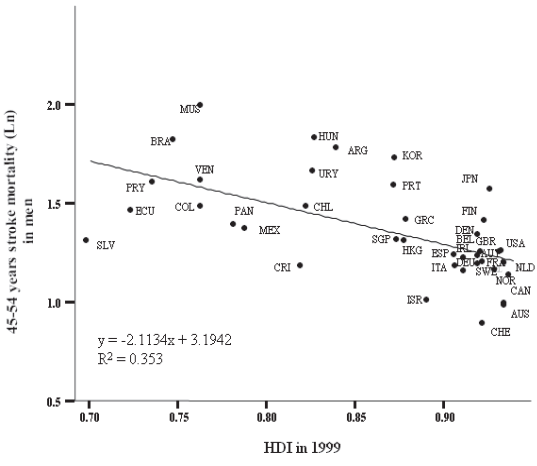

## Women

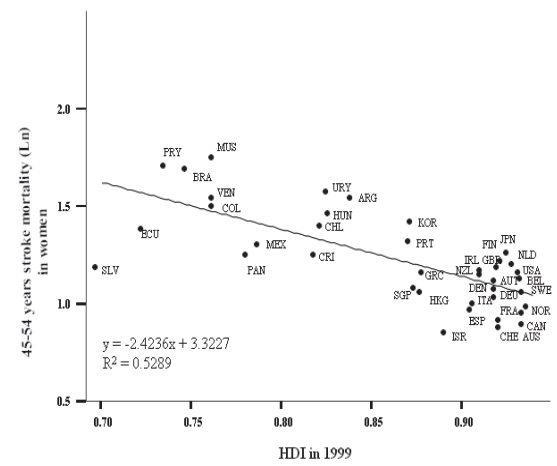

Supplement: MOESM2 [file 9551000]
